# Supplementary material for: A copperohydrogel as a chemosensor for selective detection of oxometalate anions in water
Source: Royal Society of Chemistry journal article supplement (doi:10.1039/c9ta00912d), 2019-01-01
Supplement: c9ta00912d1.pdf [file c9ta00912d1.pdf]

# **Copperhydrogel as a chemosensor for selective detection of oxometalate anions in water**

*Hamid Reza Khavasi\* and Elham Jelokhani*

Department of Inorganic Chemistry and Catalysis, Shahid Beheshti University, General Campus, Evin, Tehran 1983963113, Iran.

Email: h-khavasi@sbu.ac.ir

CORRESPONDING AUTHOR FOOTNOTE: Hamid Reza Khavasi, Tel No: +98 21 29903105, Fax No: +98 21 22431661.

## Materials and methods

**General.** Starting materials and solvents were purchased from commercial sources and used as received. Infrared spectra ( $4000\text{--}250\text{ cm}^{-1}$ ) of solid sample were recorded on a BOMEM-MB102 spectrometer as 1% dispersion in CsI pellets. Elemental analysis was performed using a Heraeus CHN-O Rapid analyzer. Melting points were obtained by a Bamstead Electrothermal type 9200 melting point apparatus and corrected. The  $^1\text{H}$  NMR spectrum was recorded on a Bruker AC-300 MHz spectrometer at ambient temperature in  $\text{DMSO-d}_6$ .  $^1\text{H}$  and  $^{13}\text{C}$  NMR chemical shifts were referenced with respect to  $\delta(\text{TMS}) = 0$  ppm. Mass spectra were obtained on an Agilent mass spectrometer with 5973 Network Mass Selective Detector model in electron impact (70 eV) mode and quadrupole analyser.

**Synthesis of ligand.** The ligand is conveniently prepared in a one pot synthesis procedure according to methods described previously.[S1] 2-Acetylpyridine (4.84 g, 40 mmol) was added into a solution of 3,4-di-methoxy benzaldehyde (3.32 g, 20 mmol) in EtOH (100 mL). KOH pellets (3.08 g, 85%, 40 mmol) and aq  $\text{NH}_3$  (58 mL, 29.3%, 50 mmol) were then added to the solution. The solution was stirred at r.t. for 4 h. The off-white solid was collected by filtration and washed with EtOH ( $3 \times 10$  mL). Yield 55%, m.p= $190^\circ\text{C}$ . Anal. Calcd.: C, 74.78; H, 5.18; N, 11.37. Found: C, 74.81; H, 5.22; N, 11.40, FT-IR ( $\text{cm}^{-1}$ ): 3317, 3054, 2236, 1679, 1587, 1468, 1390, 990, 880, 731.  $^1\text{H}$  NMR (300 MHz,  $\text{DMSO-d}_6$ ), Figure S14:  $\delta = 3.85$  ( $3\text{H}_{\text{methoxy}}$ , s), 3.92 ( $3\text{H}_{\text{methoxy}}$ , s), 7.17 ( $1\text{H}_{\text{Ar}}$ , d,  $J = 9.0$  Hz), 7.40-7.60 ( $4\text{H}_{\text{Ar}}$ , m), 7.95-8.10 ( $2\text{H}_{\text{Ar}}$ , m), 8.62-8.72 ( $4\text{H}_{\text{Ar}}$ , m), 8.73-8.83 ( $2\text{H}_{\text{Ar}}$ , m);  $^{13}\text{C}$  NMR (400 MHz,  $\text{DMSO-d}_6$ ), Figure S15:  $\delta = 155.0, 154.6, 149.6, 148.9, 148.8, 136.8, 129.5, 123.9, 120.4, 119.1, 117.1, 116.7, 109.6, 55.2, \text{ and } 55.1$ . MS  $m/z$  calcd for  $[\text{M}]^+$  ( $\text{C}_{23}\text{H}_{19}\text{N}_3\text{O}_2$ ): 369.42; found 369.4.

**Synthesis of pincer-type Cu(II) Complex:** A solution of 10 mmol of ligand in 5 mL methanol and dichloromethane mixture (1:1) was added to a solution of 10 mmol of copper(II)chloride in 5 mL methanol and dichloromethane mixture (1:1) and then heated at  $50^\circ\text{C}$  for 5 min. Green precipitate was collected by filtration and purified by recrystallization in methanol. Yield 71%, m.p=decomposed at  $200^\circ\text{C}$ . Anal.

Calcd.: C, 54.82; H, 3.80; N, 8.34. Found: C, 54.85 H, 3.83; N, 8.37. FT-IR (cm<sup>-1</sup>): 3359, 3051, 2233, 1586, 1399, 1017, 799. MS m/z calcd for [M-Cl]<sup>+</sup> (C<sub>23</sub>H<sub>19</sub>CuClN<sub>3</sub>O<sub>2</sub>)<sup>+</sup>: 468.41; found 468.4.

**Preparation of the Gels:** The elucidated green solution was achieved by dissolving of 3.2 mg of this complex in 1 ml water under heating. The stable metallogel was formed by cooling of this solution to ambient temperature.

**Crystallization of Complexes:** Suitable crystals for X-ray diffraction experiment is obtained from slow evaporation of methanol solution.

**Single crystal diffraction studies.** For crystal of copper complex intensity data were collected using a STOE IPDS-2T diffractometer with graphite monochromated Mo K $\alpha$  radiation ( $\lambda$ ) 0.71073 (Å). Data were collected in an a series of  $\omega$  scans in 1° oscillations and integrated using the Stöe X-AREA[S2] software package. A numerical absorption correction was applied using the X-RED2[S3] and X-SHAPE[S4] software's. All structures were solved by direct methods using SHELXS-97[S5] and refined with full-matrix least-squares on  $F^2$  using the SHELXL-97 program package. All non-hydrogen atoms were refined anisotropically. Hydrogen atoms were added at ideal positions and constrained to ride on their parent atoms, with  $U_{iso}(H) = 1.2U_{eq}$ . All refinements were performed using the X-STEP32 crystallographic software package.[S6] Structural illustrations have been drawn with ORTEP-3[S7] and MERCURY.[S8] Crystallographic data for compound 1 have been listed in Table S1.

#### REFERENCES:

- [S1] Wang, J.; Hanan, G. A Facile Route to Sterically Hindered and Non-Hindered 4'-Aryl-2,2':6',2''-Terpyridines. *Synlett* **2005**, 8, 1251–1254.
- [S2] Stoe, C. X-AREA: Program for the Acquisition and Analysis of Data, Version 1.30. *Stoe Cie GmbH Darmstadt, Ger.* **2005**.
- [S3] X-RED: Program for Data Reduction and Absorption Correction, vesion 1.28b: Stoe & Cie GmbH:

Darmstadt, Germany, 2005. *No Title*.

[S4] X-SHAPE: Program for crystal optimization for numerical absorption correction, vesion 2.05: Stoe & Cie GmbH: Darmstadt, Germany, 2004. No TitleX-SHAPE: Program for Crystal Optimization for Numerical Absorption Correction, Vesion 2.05: Stoe & Cie GmbH: Darmstadt, Germany, 2004.

[S5] Sheldrick, G. M. SHELX-97, Program for the Solution and Refinement of Crystal Structures. *Univ. Göttingen, Ger. 1997*.

[S6] Stoe, C. X-STEP32, Version 1.07 b, Crystallographic Package. *Stoe Cie GmbH, Darmstadt, Ger. 2000*.

[S7] Farrugia, L. J.; IUCr. *WinGX and ORTEP for Windows : An Update. J. Appl. Crystallogr. 2012, 45* (4), 849–854.

[S8] Mercury 3.10.1 Supplied with Cambridge Structural Database; CCDC: Cambridge, U.K., 2017–2018. Mercury 3.10.1 Supplied with Cambridge Structural Database; CCDC: Cambridge, U.K., 2017–2018No Title.

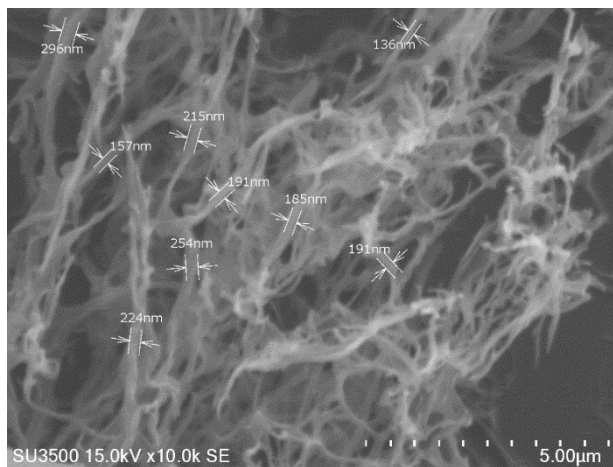

**Figure S1.** SEM image of the vacuum dried gel, xerogel, formed from the gel obtained by dissolution of the ligand and  $\text{CuCl}_2$  salt in water.

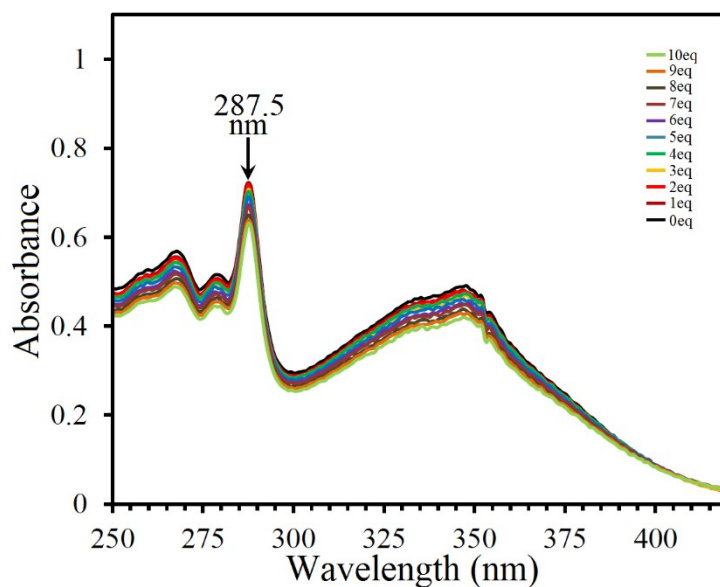

**Figure S2.** UV-vis spectral changes observed for  $[\text{CuCl}_2 \text{L}^{3,4(\text{OMe})_2\text{-phen}}_{\text{Terpy}}]$  metal complex ( $2.8 \times 10^{-5}$  M) upon addition of sodium salt of  $\text{Cl}^-$  anion in water. Arrow indicates the absorption band decreases during the titration.

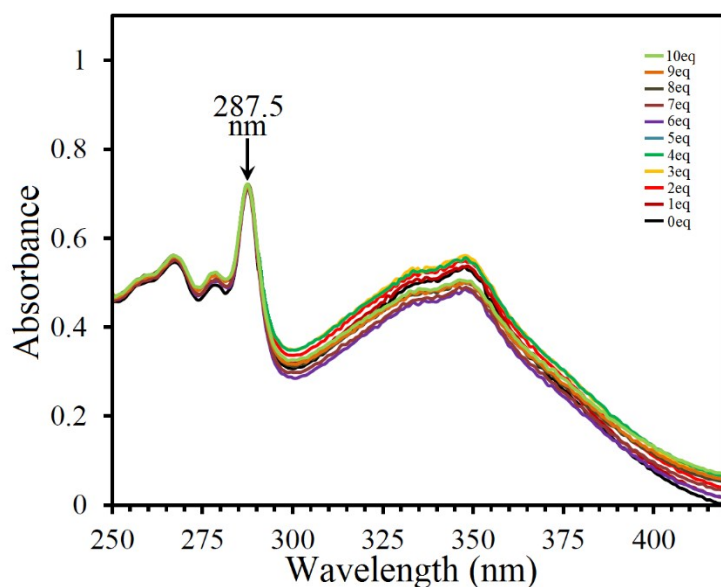

**Figure S3.** UV-vis spectral changes observed for  $[\text{CuCl}_2 L^{3,4(\text{OMe})_2\text{-phen}}_{\text{Terpy}}]$  metal complex ( $2.8 \times 10^{-5}$  M) upon addition of sodium salt of  $\text{Br}^-$  anion in water. Arrow indicates the absorption band decreases during the titration.

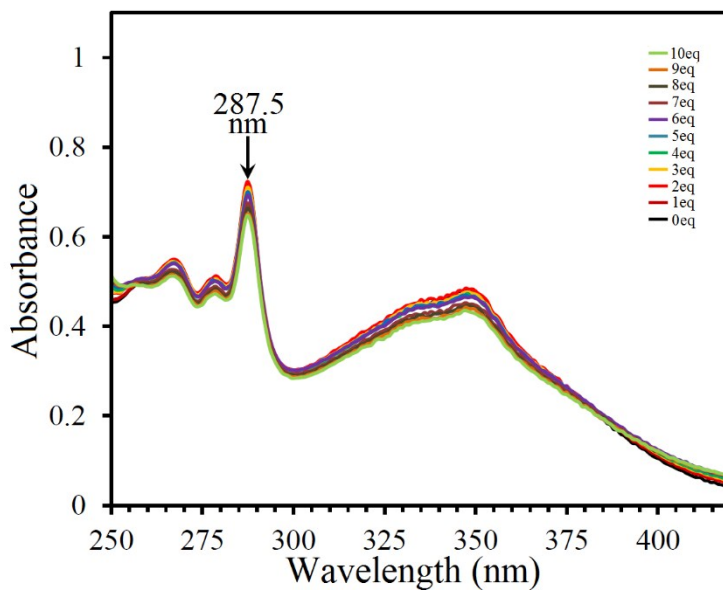

**Figure S4.** UV-vis spectral changes observed for  $[\text{CuCl}_2 L^{3,4(\text{OMe})_2\text{-phen}}_{\text{Terpy}}]$  metal complex ( $2.8 \times 10^{-5}$  M) upon addition of sodium salt of  $\text{I}^-$  anion in water. Arrow indicates the absorption band decreases during the titration.

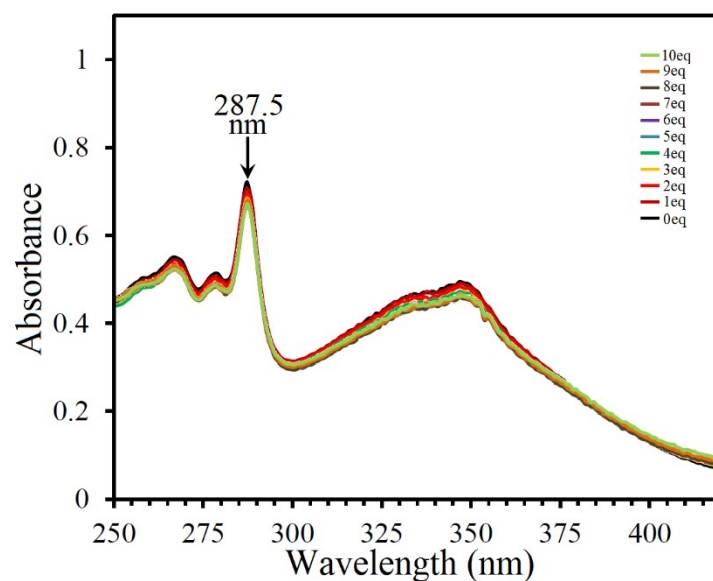

**Figure S5.** UV-vis spectral changes observed for  $[\text{CuCl}_2 L^{3,4(\text{OMe})_2\text{-phen}}]$  metal complex ( $2.8 \times 10^{-5}$  M) upon addition of sodium salt of  $\text{NO}_2^-$  anion in water. Arrow indicates the absorption band decreases during the titration.

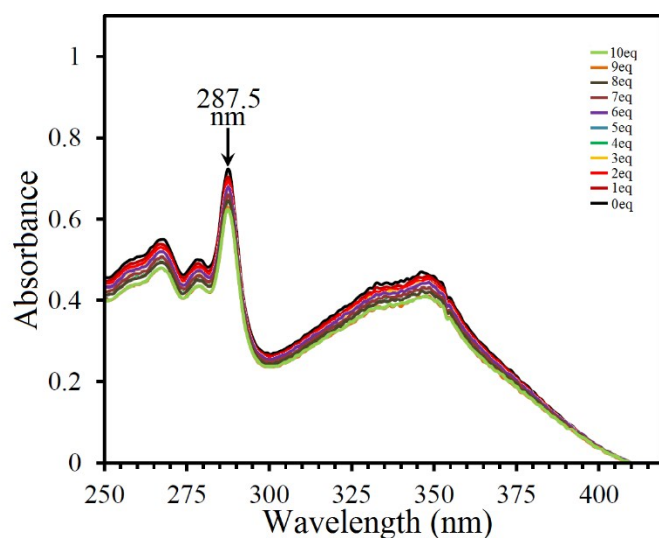

**Figure S6.** UV-vis spectral changes observed for  $[\text{CuCl}_2 L^{3,4(\text{OMe})_2\text{-phen}}]$  metal complex ( $2.8 \times 10^{-5}$  M) upon addition of sodium salt of  $\text{NO}_3^-$  anion in water. Arrow indicates the absorption band decreases during the titration.

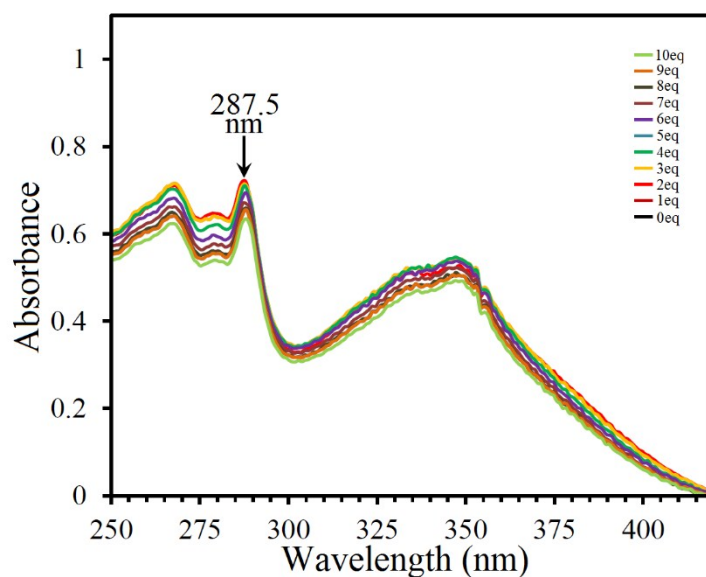

**Figure S7.** UV-vis spectral changes observed for  $[\text{CuCl}_2\text{L}^{3,4(\text{OMe})_2\text{-phen}}]$  metal complex ( $2.8 \times 10^{-5}$  M) upon addition of sodium salt of  $\text{PO}_4^{3-}$  anion in water. Arrow indicates the absorption band decreases during the titration.

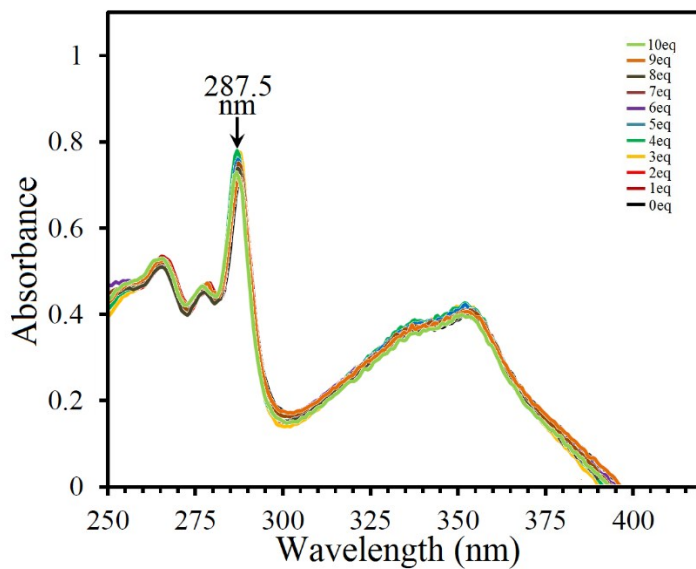

**Figure S8.** UV-vis spectral changes observed for  $[\text{CuCl}_2\text{L}^{3,4(\text{OMe})_2\text{-phen}}]$  metal complex ( $2.8 \times 10^{-5}$  M) upon addition of sodium salt of  $\text{SO}_3^{2-}$  anion in water. Arrow indicates the absorption band decreases during the titration.



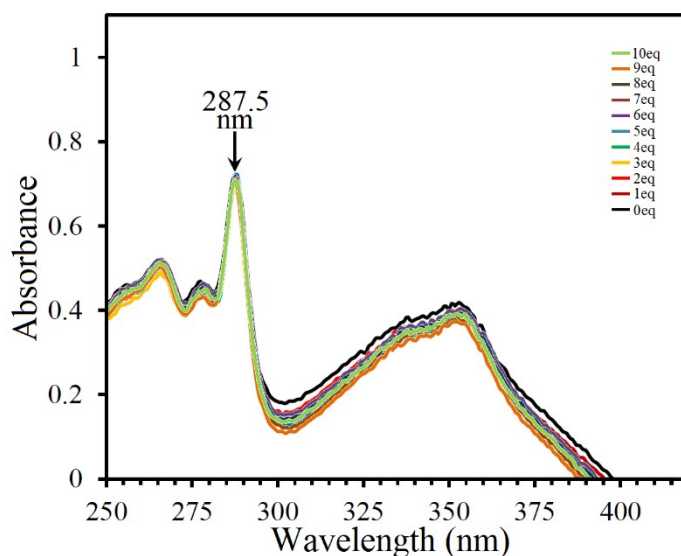

**Figure S9.** UV-vis spectral changes observed for  $[\text{CuCl}_2\text{L}^{3,4}(\text{OMe})_2\text{-phen}]$  metal complex ( $2.8 \times 10^{-5}$  M) upon addition of sodium salt of  $\text{SO}_4^{2-}$  anion in water. Arrow indicates the absorption band decreases during the titration.

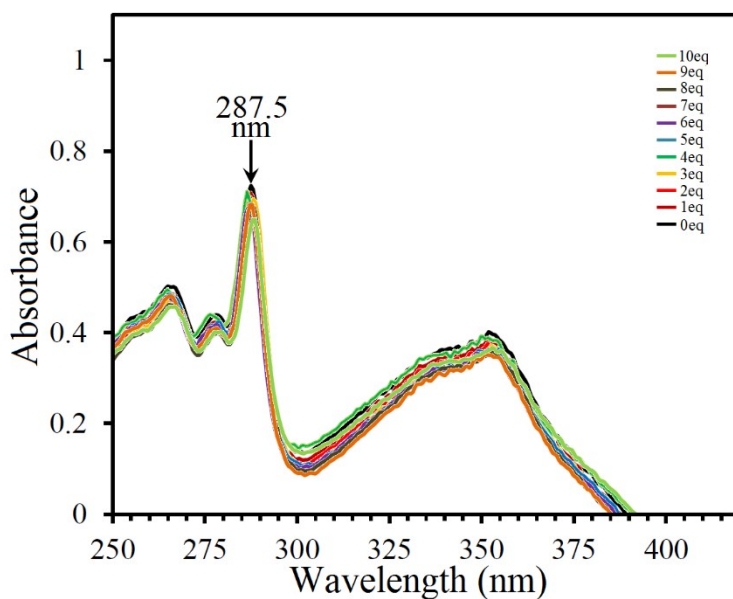

**Figure S10.** UV-vis spectral changes observed for  $[\text{CuCl}_2\text{L}^{3,4}(\text{OMe})_2\text{-phen}]$  metal complex ( $2.8 \times 10^{-5}$  M) upon addition of sodium salt of  $\text{ClO}_4^-$  anion in water. Arrow indicates the absorption band decreases during the titration.

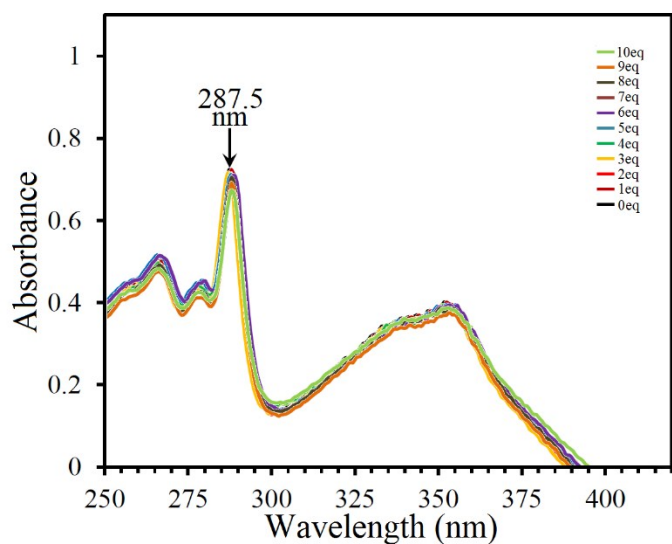

**Figure S11.** UV-vis spectral changes observed for  $[\text{CuCl}_2\text{L}^{3,4(\text{OMe})_2\text{-phen}}_{\text{Terpy}}]$  metal complex ( $2.8 \times 10^{-5} \text{ M}$ ) upon addition of sodium salt of  $\text{HSO}_3^-$  anion in water. Arrow indicates the absorption band decreases during the titration.

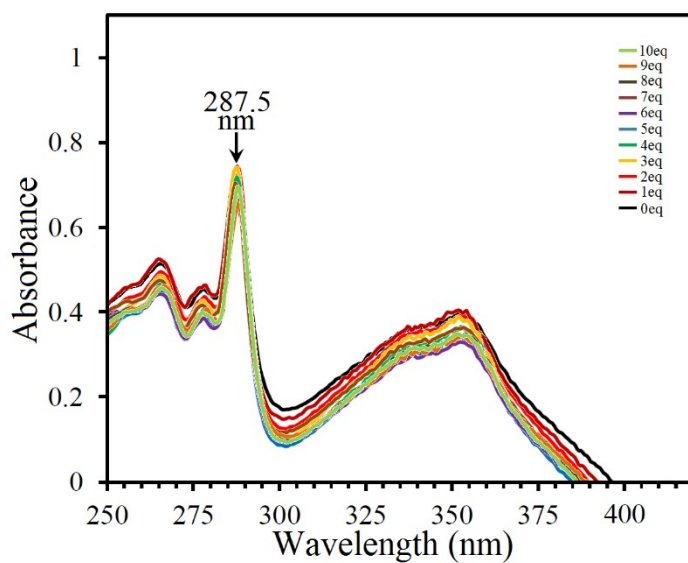

**Figure S12.** UV-vis spectral changes observed for  $[\text{CuCl}_2\text{L}^{3,4(\text{OMe})_2\text{-phen}}_{\text{Terpy}}]$  metal complex ( $2.8 \times 10^{-5} \text{ M}$ ) upon addition of sodium salt of  $\text{CN}^-$  anion in water. Arrow indicates the absorption band decreases during the titration.

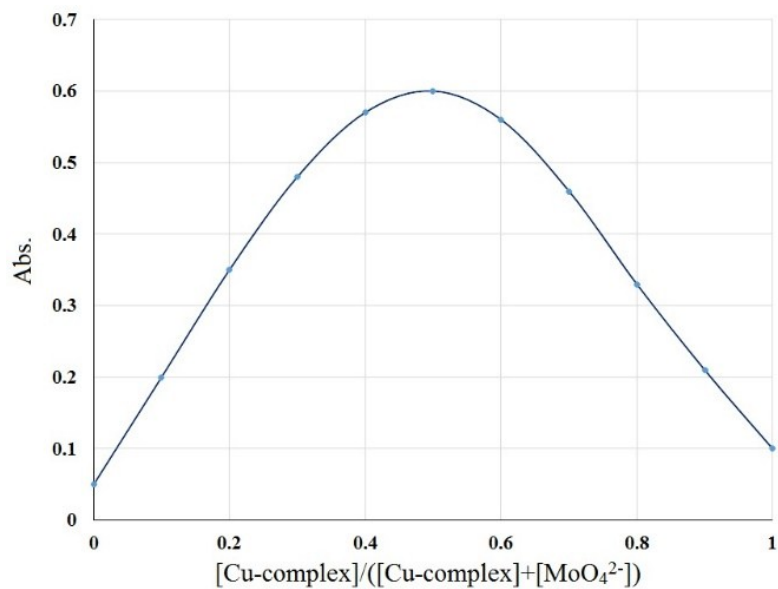

**Figure S13.** Job plot receptor of  $[\text{CuCl}_2 L^{3,4(\text{OMe})2-\text{phen}}_{\text{Terpy}}]$  metal complex with  $\text{MoO}_4^{2-}$  anion at 287.5 nm. The total concentration of the host and guest was  $2.8 \times 10^{-5}$  M.

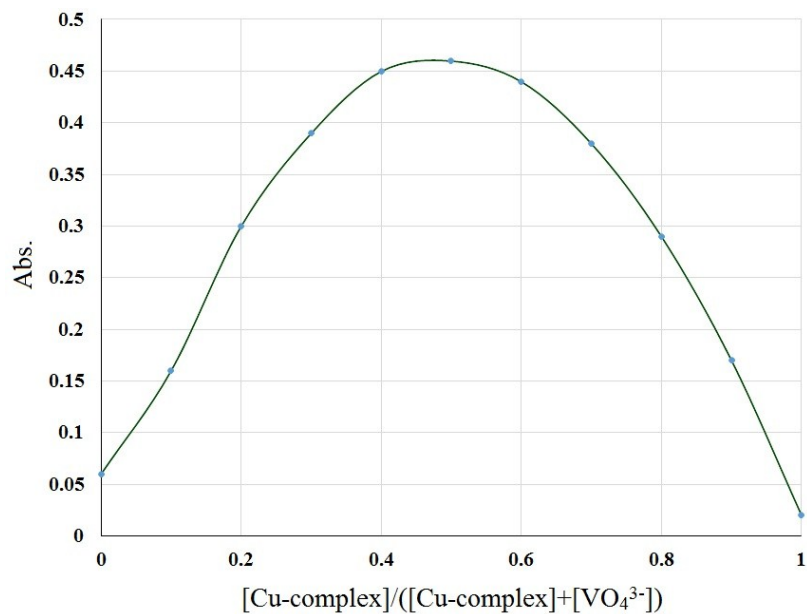

**Figure S14.** Job plot receptor of  $[\text{CuCl}_2 L^{3,4(\text{OMe})2-\text{phen}}_{\text{Terpy}}]$  metal complex with  $\text{VO}_4^{3-}$  anion at 287.5 nm. The total concentration of the host and guest was  $2.8 \times 10^{-5}$  M.

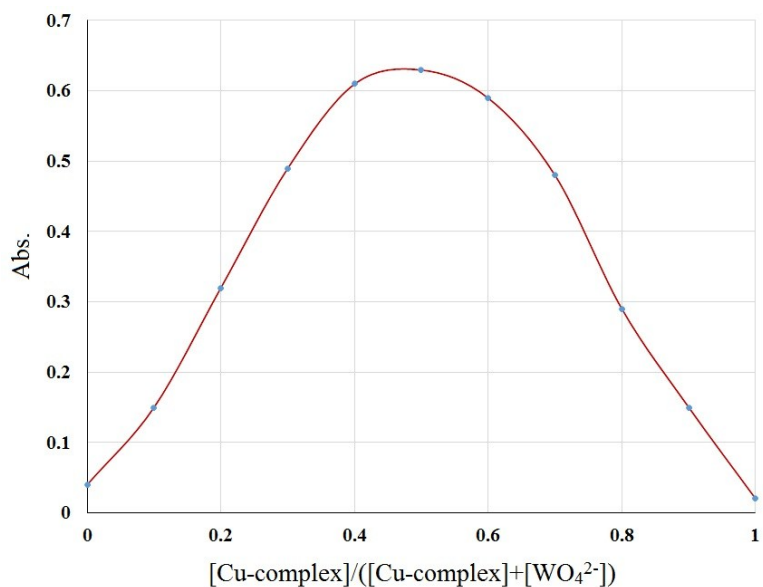

**Figure S15.** Job plot receptor of  $[CuCl_2 L^{3,4(OMe)_2-phen}_{Terry}]$  metal complex with  $WO_4^{2-}$  anion at 287.5 nm. The total concentration of the host and guest was  $2.8 \times 10^{-5}$  M.

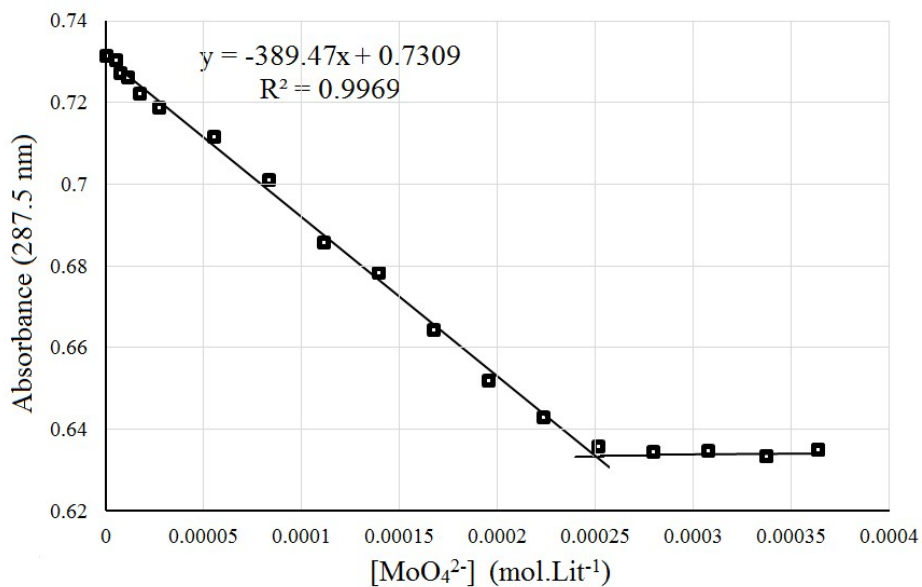

**Figure S16.** The plot of absorbance (at 287.5 nm) changes of aqueous solution of  $[CuCl_2 L^{3,4(OMe)_2-phen}_{Terry}]$  metal complex ( $2.8 \times 10^{-5}$  M) against addition of aqueous solution of  $MoO_4^{2-}$  anion.

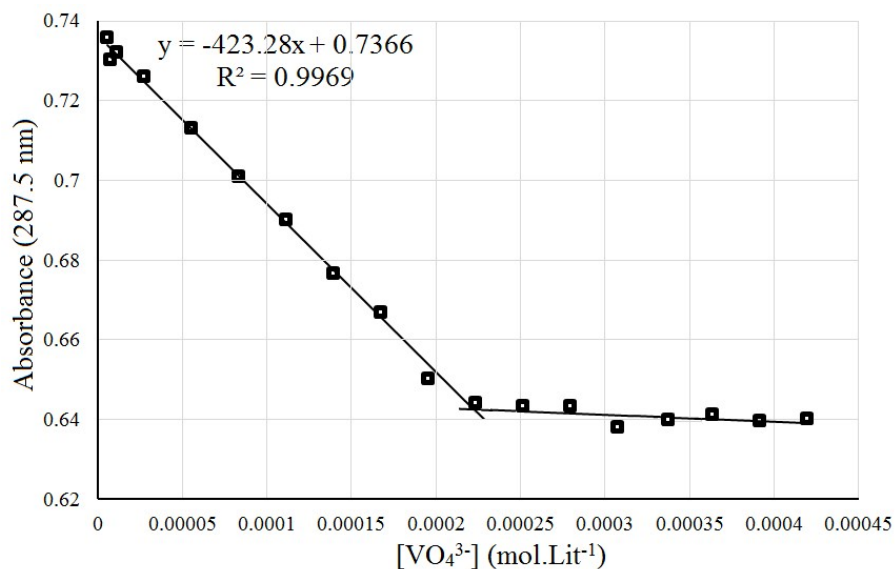

**Figure S17.** The plot of absorbance (at 287.5 nm) changes of aqueous solution of  $[\text{CuCl}_2\text{L}^{3,4(\text{OMe})_2\text{-phen}}_{\text{Terry}}]$  metal complex ( $2.8 \times 10^{-5}$  M) against addition of aqueous solution of  $\text{VO}_4^{3-}$  anion.

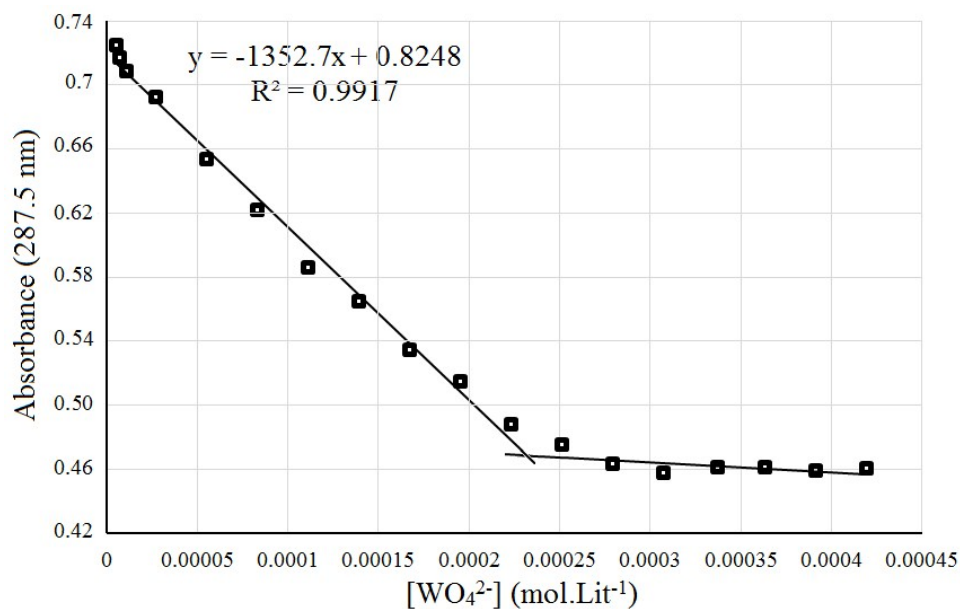

**Figure S18.** The plot of absorbance (at 287.5 nm) changes of aqueous solution of  $[\text{CuCl}_2\text{L}^{3,4(\text{OMe})_2\text{-phen}}_{\text{Terry}}]$  metal complex ( $2.8 \times 10^{-5}$  M) against addition of aqueous solution of  $\text{WO}_4^{2-}$  anion.

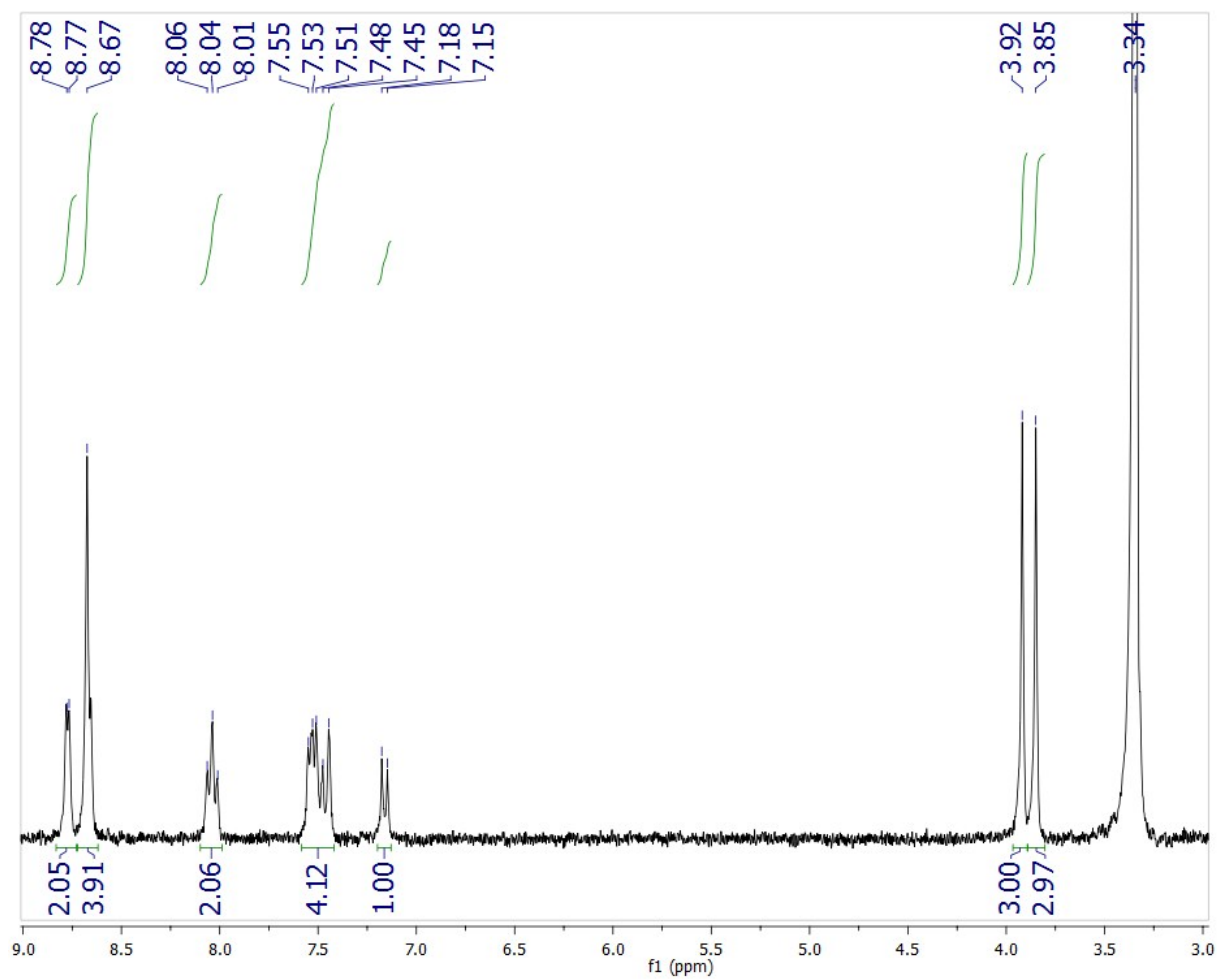

**Figure S19.** <sup>1</sup>H NMR spectrum of 4'-(3,4-dimethoxy-phenyl)-[2,2';6',2'']terpyridine,  $L^{3,4(OMe)2-phen}_{Terpy}$ , was recorded on a Bruker AC-300 MHz spectrometer at ambient temperature in DMSO-d<sub>6</sub>. The chemical shifts were referenced with respect to δ(TMS) = 0 ppm.

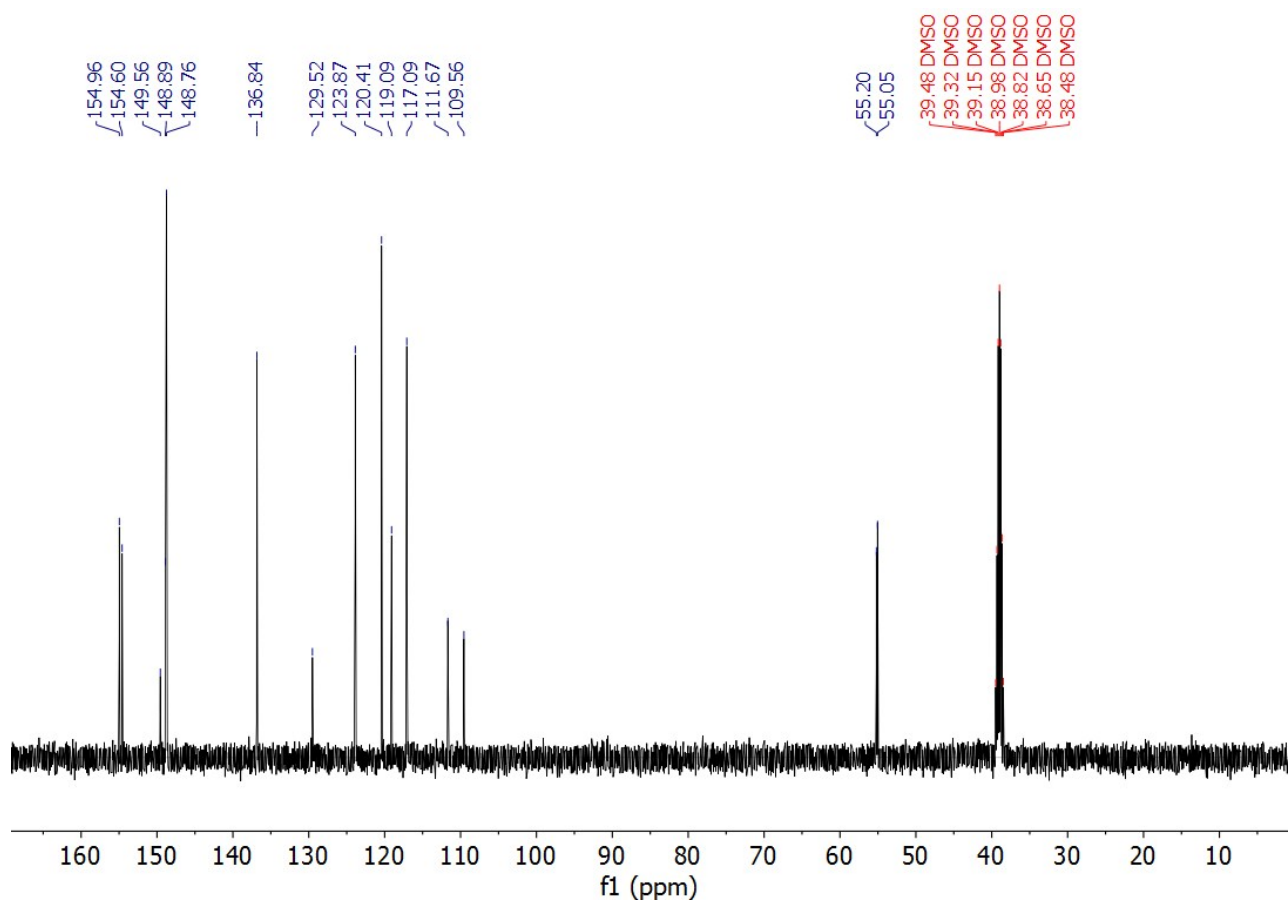

**Figure S20.**  $^{13}\text{C}$  NMR spectrum of 4'-(3,4-dimethoxy-phenyl)-[2,2';6',2'']terpyridine,  $L^{3,4(\text{OMe})_2\text{-phen}}_{\text{Terpy}}$ , was recorded on a Bruker AC-300 MHz spectrometer at ambient temperature in  $\text{DMSO-d}_6$ . The chemical shifts were referenced with respect to  $\delta(\text{TMS}) = 0$  ppm.

**Table S1.** Crystal data and structural refinement for copper complex of  $[\text{CuCl}_2 \text{L}^{3,4(\text{OMe})2-\text{phen}}_{\text{Terpy}}]$ .

|                                  | $[\text{CuCl}_2 \text{L}^{3,4(\text{OMe})2-\text{phen}}_{\text{Terpy}}]$ |
|----------------------------------|--------------------------------------------------------------------------|
| formula                          | $\text{C}_{23}\text{H}_{19}\text{Cl}_2\text{CuN}_3\text{O}_2$            |
| fw                               | 503.86                                                                   |
| $\lambda/\text{\AA}$             | 0.71073                                                                  |
| $T/\text{K}$                     | 298(2)                                                                   |
| crystal.system                   | Monoclinic                                                               |
| space group                      | $C2/c$                                                                   |
| $a/\text{\AA}$                   | 25.287(4)                                                                |
| $b/\text{\AA}$                   | 14.2223(18)                                                              |
| $c/\text{\AA}$                   | 13.780(2)                                                                |
| $\beta/^\circ$                   | 121.338(9)                                                               |
| $V/\text{\AA}^3$                 | 4233.0(10)                                                               |
| $\rho_{\text{calc}}/\text{cm}^3$ | 1.581                                                                    |
| $Z$                              | 8                                                                        |
| $\mu/\text{mm}^{-1}$             | 1.311                                                                    |
| $F(000)$                         | 2056                                                                     |
| $2\theta/^\circ$                 | 54.00                                                                    |
| $R(\text{int})$                  | 0.0712                                                                   |
| GOOF                             | 1.012                                                                    |
| $R_1^a(I > 2\sigma(I))$          | 0.0690                                                                   |
| $wR_2^b(I > 2\sigma(I))$         | 0.1379                                                                   |
| CCDC No.                         | 1873052                                                                  |

$$^a R_1 = \frac{\sum ||F_o| - |F_c||}{\sum |F_o|}, \quad ^b wR_2 = \frac{[\sum (w(F_o^2 - F_c^2)^2) / \sum w(F_o^2)^2]}{2}^{1/2}.$$



**Table S2.** Coordination geometry, dimensionality and aromatic interaction parameters (Å and °) for description of  $\pi$ - $\pi$  interaction in complex  $[\text{CuCl}_2 \text{L}^{3,4(\text{OMe})_2\text{-phen}}_{\text{Terpy}}]$ .

| Cg(I)-Cg(J)               | $d_{\text{Cg-Cg}}^a$ | $\alpha^b$ | $\beta, \gamma^c$ | $d_{\text{plane-plane}}^d$ | $d_{\text{offset}}^e$ |
|---------------------------|----------------------|------------|-------------------|----------------------------|-----------------------|
| Cg(1)-Cg(2) <sup>i</sup>  | 3.750                | 8.74       | 25.53, 16.80      | 3.590, 3.384               | 1.084, 1.616          |
| Cg(1)-Cg(2) <sup>ii</sup> | 3.664                | 2.71       | 20.23, 17.73      | 3.490, 3.438               | 0.304, 0.346          |

<sup>a</sup> Centroid-centroid distance. <sup>b</sup> Dihedral angle between the ring plane. <sup>c</sup> Offset angles: angle between Cg(I)–Cg(J) vector and normal to plane I, angle between Cg(I)–Cg(J) vector and normal to plane J ( $\beta = \gamma$  when  $\alpha = 0$ ). <sup>d</sup> Perpendicular distance of Cg(I) on ring J and perpendicular distance of Cg(J) on ring I. <sup>e</sup> Horizontal displacement between Cg(I) and Cg(J), two values if the two rings are not exactly parallel ( $\alpha \neq 0$ ). Cg(1): centroid of N(2)-C(6)-C(7)-C(8)-C(9)-C(10), and Cg(2): centroid of N3(7)-C(11)-C(12)-C(13)-C(14)-C(15). Symmetry codes: (i) 1-x, y, 3/2-z, and (ii) 1-x, 1-y, 1-z.

**Table S3.** Hydrogen bonding parameters (Å and °) for complex  $[\text{CuCl}_2 \text{L}^{3,4(\text{OMe})_2\text{-phen}}_{\text{Terpy}}]$ .

| Compound                                                                  | D-H...A         | d(D-H) | d(H...A) | d(D...A) | <(DHA) | Symmetry codes       |
|---------------------------------------------------------------------------|-----------------|--------|----------|----------|--------|----------------------|
| $[\text{CuCl}_2 \text{L}^{3,4(\text{OMe})_2\text{-phen}}_{\text{Terpy}}]$ | C9-H9...Cl2     | 0.930  | 2.780    | 3.655(6) | 157.2  | 1-x, 1-y, 1-z        |
|                                                                           | C12-H12...Cl2   | 0.930  | 2.613    | 3.500(7) | 159.7  | 1-x, 1-y, 1-z        |
|                                                                           | C9-H9...Cl2     | 0.930  | 2.884    | 3.797(5) | 167.4  | 1-x, 1-y, 1-z        |
|                                                                           | C20-H20...Cl1   | 0.930  | 2.854    | 3.516(6) | 129.2  | 1/2+x, 3/2-y, 1/2+z  |
|                                                                           | C22-H22...Cl2   | 0.960  | 2.874    | 3.473(7) | 121.1  | 1-x, 1-y, 1-z        |
|                                                                           | C23-H23C... Cl2 | 0.930  | 2.942    | 3.690(8) | 135.7  | 3/2-x, -1/2+y, 3/2-z |

**Table S4.** Geometrical parameters (Å and °) for the description of the Cu-Cl... $\pi$  interaction in complex  $[\text{CuCl}_2 \text{L}^{3,4(\text{OMe})_2\text{-phen}}_{\text{Terpy}}]$ .

|                                        | Cu-Cl... $\pi$ <sup>#1</sup> | Definition of geometrical Cu-Cl... $\pi$ parameters |
|----------------------------------------|------------------------------|-----------------------------------------------------|
| $r_r$ (Å) <sup>a</sup>                 | 3.611                        |                                                     |
| $r_a$ (Å) <sup>a</sup>                 | 3.344(8) (C5)                |                                                     |
| $r_b$ (Å) <sup>a</sup>                 | 3.385                        |                                                     |
| $D_{\text{centroid}}$ (Å) <sup>b</sup> | 3.611                        |                                                     |
| $d_{\text{plane}}$ (Å) <sup>c</sup>    | 3.341                        |                                                     |
| $d_{\text{offset}}$ (Å) <sup>d</sup>   | 1.370                        |                                                     |
| $\alpha$ (°) <sup>e</sup>              | 67.7                         |                                                     |
| $\beta$ (°) <sup>f</sup>               | 109.47                       |                                                     |
| Type <sup>g</sup>                      | L                            |                                                     |
| Sym. code                              | #1: 1-x, y, 3/2-z            |                                                     |

<sup>a</sup> $r_i$  is the shortest distance between the halogen and ring member atom, ( $r_a$ ), bond, ( $r_b$ ), or centroid of the ring atoms, Cg, ( $r_r$ ). <sup>b</sup> $D_{\text{centroid}}$  is the halogen distance from the centroid of ring atoms. <sup>c</sup> $d_{\text{plane}}$  is the distance between halogen atom and the ring plane. <sup>d</sup> $d_{\text{offset}}$  is the parameter which determines displacement of the halogen from the centre of the aromatic ring, [ $d_{\text{offset}} = (D_{\text{centroid}}^2 - d_{\text{plane}}^2)^{1/2}$ ]. <sup>e</sup> $\alpha$  is angle between  $D_{\text{centroid}}$  and  $d_{\text{offset}}$  vectors. <sup>f</sup> $\beta$  is Zn-X-Cg angle. <sup>g</sup>Localized, delocalized and semi-localized Cu-Cl... $\pi$  interactions are abbreviated by L-type, D-type and SL-type, respectively.
